# Supplementary material for: Engineering the substrate preference of glucose oxidase for the enzymatic oxidation of xylose
Source: Royal Society of Chemistry journal article supplement (doi:10.1039/d3gc04981g), 2024-01-01
Supplement: d3gc04981g1.pdf [file d3gc04981g1.pdf]

## Supporting Information

### Engineering the substrate preference of glucose oxidase for the enzymatic oxidation of xylose

Yue Wang,<sup>‡a</sup> Xueting Cao,<sup>‡b</sup> Shanshan Jiang,<sup>a</sup> Liwei Gao,<sup>c</sup> Xiaolong Han,<sup>d</sup> Jingyao Qu,<sup>a</sup> Xukai Jiang,<sup>b</sup> Guodong Liu,<sup>\*a,b</sup> and Yinbo Qu<sup>a,b</sup>

<sup>a</sup> State Key Laboratory of Microbial Technology, Shandong University, Qingdao 266237, China

<sup>b</sup> National Glycoengineering Research Center, Shandong Key Laboratory of Carbohydrate Chemistry and Glycobiology, NMPA Key Laboratory for Quality Research and Evaluation of Carbohydrate-Based Medicine, Shandong University, Qingdao 266237, China

<sup>c</sup> Tobacco Research Institute of Chinese Academy of Agricultural Sciences, Qingdao 266101, China

<sup>d</sup> School of Life Science and Bioengineering, Jining University, Jining 273155, China

<sup>‡</sup>Equal contributors. These authors contributed equally.

\*Corresponding Author. Email: gdliau@sdu.edu.cn (G. Liu)

### Contents

1. Coding sequence of wild-type *Aspergillus niger* glucose oxidase used in this study.
2. Primers used in this study.
3. Mutagenesis of AnGOx based on the comparison with AfGDH.
4. SDS-PAGE analysis of purified enzymes.
5. Plots for the determination of kinetic parameters of enzymes.
6. Thermostabilities of AnGOx (WT) and the T110V/F414L mutant.
7. Time evolution of RMSD for AnGOx, T110V, and T110V/F414L with D-xylose.
8. Changes in the RMSF values of T110V and T110V/F414L relative to the wild-type AnGOx.
9. Front view of the substrate pocket of AnGOX.
10. Distribution of distances between the O1 atom of D-glucose and catalytic histidine residues of AnGOx (A), T110V (B), and T110V/F414L (C), during MD simulations.
11. <sup>1</sup>H NMR spectra of purified D-xylonate product (A) and commercial lithium D-xylonate as a standard (B).

## Supplemental data

Coding sequence of wild-type *Aspergillus niger* glucose oxidase used in this study (mature protein, codon optimized for *Pichia pastoris*):

TCTAATGGTATTGAAGCTTCTTTGTTGACTGATCCAAAAGATGTTTCTGGTAGAACTGTT  
GATTATATTATTGCTGGTGGAGGTTTACTGGTTTACTACTGCTGCTAGATTGACTGAA  
AATCCAAATATTTCTGTTTTGGTTATTGAATCTGGTTCTTATGAATCTGATAGAGGTCCA  
ATTATTGAAGATTTGAATGCTTATGGTGATATTTTTGGTTCTTCTGTTGATCATGCTTATG  
AACTGTTGAATTGGCTACTAATAATCAAAGTCTTTGATTAGATCTGGTAATGGTTTTGG  
GTGGTTCTACTTTGGTTAATGGTGGTACTTGGACTAGACCACATAAAGCTCAAGTTGAT  
TCTTGGGAAACTGTTTTTGGTAATGAAGTTGGAATTGGGATAATGTTGCTGCTTATTCT  
TTGCAAGCTGAAAGAGCTAGAGCTCCAAATGCTAAACAAATTGCTGCTGGTCAATTATT  
TAATGCTTCTTGTCATGGTGTTAATGGTACTGTTTCTGCTGGTCCAAGAGATACTGGTGA  
TGATTATTCTCCAATTGTTAAAGCTTTGATGCTGCTGTTGAAGATAGAGGTGTTCCAAC  
TAAAAAAGATTTTGGTTGTGGTGATCCACATGGTGTCTTCTATGTTTCCAAATACTTTGCA  
TGAAGATCAAGTTAGATCTGATGCTGCTAGAGAATGGTTGTTGCCAAATTATCAAAGAC  
CAAATTTGCAAGTTTTGACTGGTCAATATGTTGGTAAAGTTTTGTTGTCTCAAATGGT  
ACTACTCCAAGAGCTGTTGGTGTGAATTTGGTACTCATAAAGGTAATACTCATAATGTT  
TATGCTAAACATGAAGTTTTGTTGGCTGCTGGTTCTGCTGTTTCTCCAACTATTTGGAA  
TATTCTGGTATTGGTATGAAATCTATTTTGAACCATTGGGTATTGATACTGTTGTTGATT  
TGCCTGTTGTTTTGAATTTGCAAGATCAAAGTACTGCTACTGTTAGATCTAGAATACTT  
CTGCTGGTGGTCAAGGACAAGCTGCTTGGTTTGGTACTTTCAATGAAACTTTTGG  
AGACTATTCTGAAAAAGCTCATGAATTGTTGAATACTAAATTGGAACAATGGGCTGAAG  
AAGCTGTTGCTAGAGGAGGATTCACAATACTACTGCTTTGTTGATTCAATATGAAAAT  
TATAGAGATTGGATCGTCAATCACAATGTTGCTTATTCTGAATTGTTTTTGGATACTGCT  
GGTGTGCTTCTTTTGGTATTGTTGGCATTACTAGAGGTTATGTTTCAATTT  
TGGATAAAGATCCATATTTGCATCATTTTGGTATGATCCACAATATTTTTTGAATGAATT  
GGATTTGTTGGGTCAAGCTGCAGCTACTCAATTGGCTAGAAATATTTCTAATTCTGGTG  
CTATGCAAACCTATTTTGGTGGTGAAGTATTCCTGGTGATAATTTGGCTTATGATGCTG  
ATTTGTCTGCTTGGACTGAATATATCCATATCATTTTAGACCAAATTATCATGGTGTGG  
TACTTGTCTATGATGCCAAAAGAAATGGGTGGTGTGTTGATAATGCAGCAAGAGTTT  
ATGGTGTTCAGGTTTGGAGATTATTGATGGTCTATTCCACCAACTCAAATGTCTTCTC  
ATGTTATGACTGTTTTTTATGCTATGGCTTTGAAAATTTCTGATGCTATTTTGGGAAGATTA  
TGCTTCTATGCAATAA

**Table S1.** Primers used in this study.

| Primer              | Sequence (5'-3')                                         | Note                                                             |
|---------------------|----------------------------------------------------------|------------------------------------------------------------------|
| Sc Alpha-m+GOx-Pp F | TCTAGAACTAGTGGATCCCCCATGA<br>GATTCCTTCAATTTTTAC          | Amplification of <i>Angox</i> sequence upstream of T110 codon    |
| T110-R              | ACCACCATTAACCAAAGTAGAACC<br>ACCCAAACCATTACCAG            |                                                                  |
| T110-F              | CTACTTTGGTTAATGGTGGT <u>NNK</u> TG<br>GACTAGACCACATAAAGC | Amplification of <i>Angox</i> sequence downstream of T110 codon  |
| Sc GOx-Pp+Alpha-m R | ACTAATTACATGAGGGCCCCCCTT<br>ATTGCATAGAAGCATAATC          |                                                                  |
| F414-R              | CAATTCAGAATAAGCAACATTGTGA<br>TTGACGATCCAATCTCTA          | Amplification of <i>Angox</i> together with Sc Alpha-m+GOx-Pp F  |
| F414-F              | CAATGTTGCTTATTCTGAATTG <u>NNK</u><br>TTGGATACTGCTGGTGTGG | Amplification of <i>Angox</i> together with Sc GOx-Pp+Alpha-m R  |
| Pp-GOx-Pp F         | AGGCTGAAGCTTACGTAGAATTCTC<br>TAATGGTATTGAAGCTTCTTTG      | Amplification of <i>Angox</i> sequence upstream of T110V codon   |
| T110V R             | CTTTATGTGGTCTAGTCCA <u>AA</u> CACC<br>ACCATTAACCAAAGTAG  |                                                                  |
| T110V F             | CTACTTTGGTTAATGGTGGT <u>GTTT</u> G<br>GACTAGACCACATAAAG  | Amplification of <i>Angox</i> sequence downstream of T110V codon |
| Pp-GOx-Pp R         | TTAATTCGCGGCCCGCCCTAGGGTTA<br>TTGCATAGAAGCATAATC         |                                                                  |
| F414L R             | GCAACACCAGCAGTATCCAACAAC<br><u>AA</u> TTCAGAATAAGCAAC    | Amplification of <i>Angox</i> together with Pp-GOx-Pp F          |
| F414L F             | GTTGCTTATTCTGAATTGTTG <u>TTGG</u><br>ATACTGCTGGTGTGGC    | Amplification of <i>Angox</i> together with Pp-GOx-Pp R          |

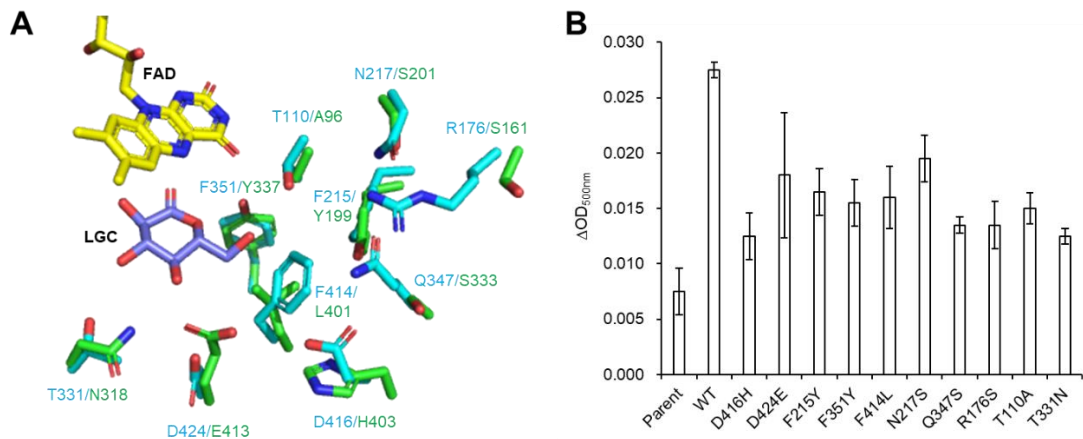

**Fig. S1.** Mutagenesis of AnGOx based on the comparison with AfGDH. (A) Amino acid variations between AnGOX (cyan) and AfGDH (green) around the substrate-binding pocket. (B)  $\Delta OD_{500\text{ nm}}$  values in the D-xylose oxidase assay of the culture supernatants of *Saccharomyces cerevisiae* strains expressing AnGOx mutants. Data represent the mean  $\pm$  SD from duplicate cultivations.

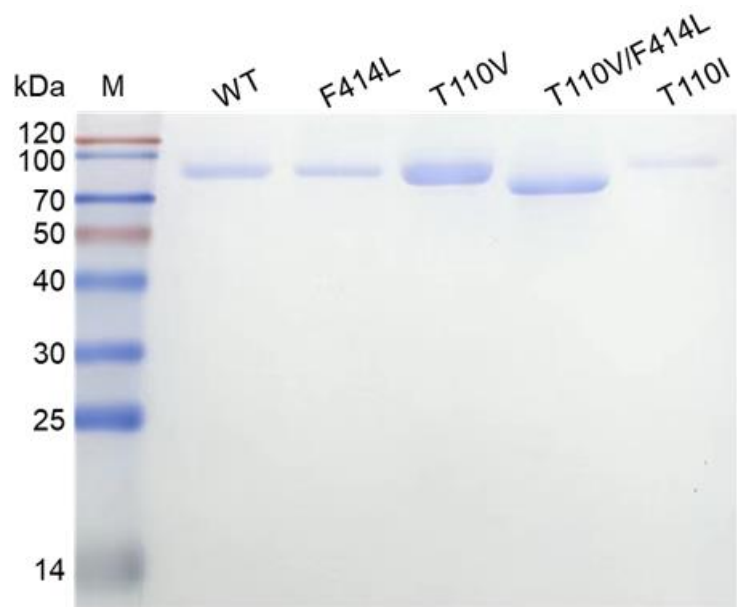

**Fig. S2.** SDS-PAGE analysis of purified enzymes.

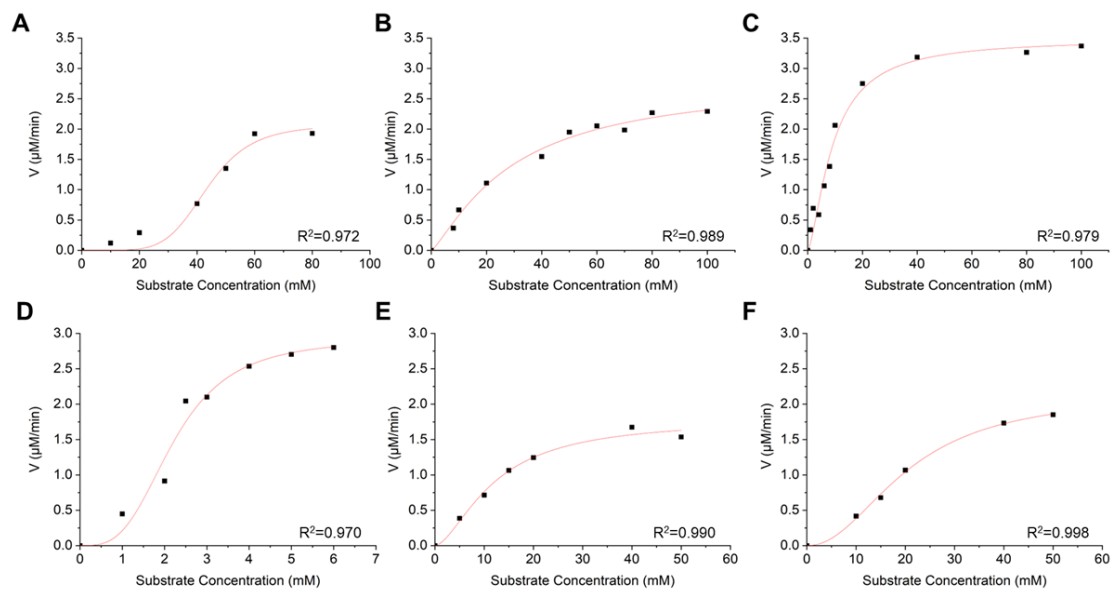

**Fig. S3.** Plots for the determination of kinetic parameters of enzymes. The Hill equation was used to fit the plots. (A–C) WT, T110V and T110V/F414L on D-xylose, respectively. (D–F) WT, T110V and T110V/F414L on D-glucose, respectively.

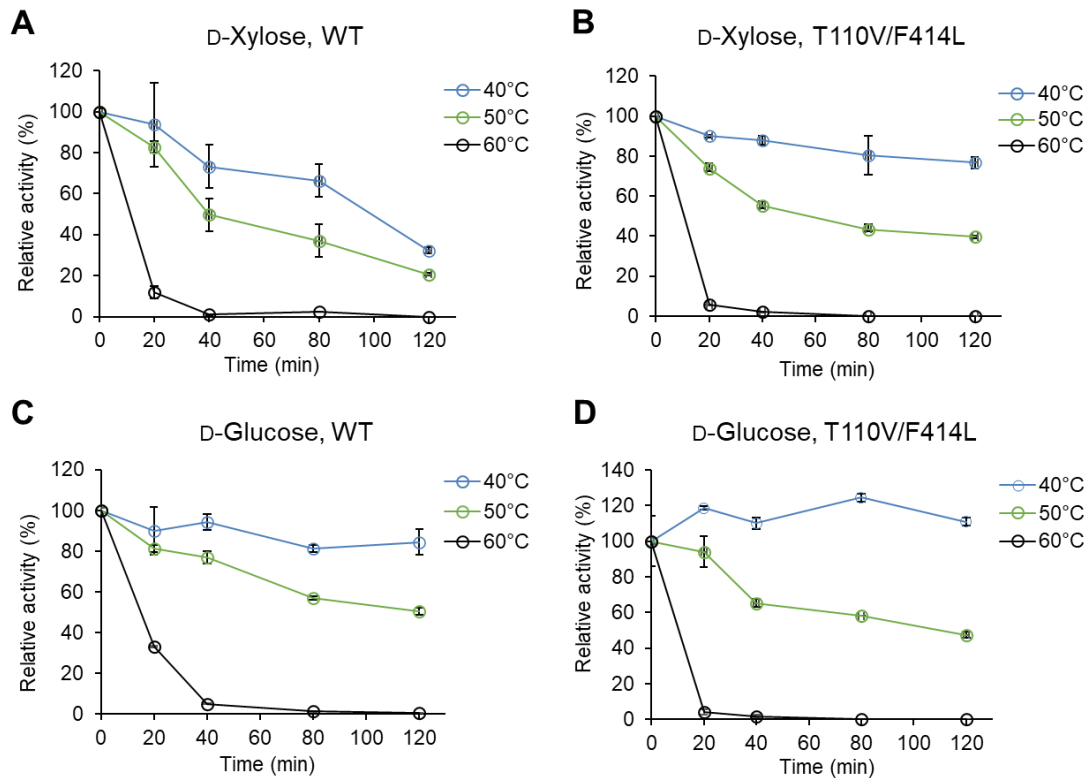

**Fig. S4.** Thermostabilities of AnGOx (WT) and the T110V/F414L mutant. The purified proteins were incubated at different temperatures for the indicated time, and the activities towards D-xylose (A, B) and D-glucose (C, D) were measured at pH 6.0 and 35 °C. Data represent the mean  $\pm$  SD from duplicate measurements.

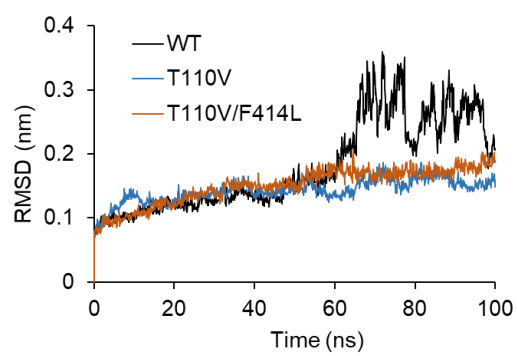

**Fig. S5.** Time evolution of RMSD for AnGOx, T110V, and T110V/F414L with D-xylose.



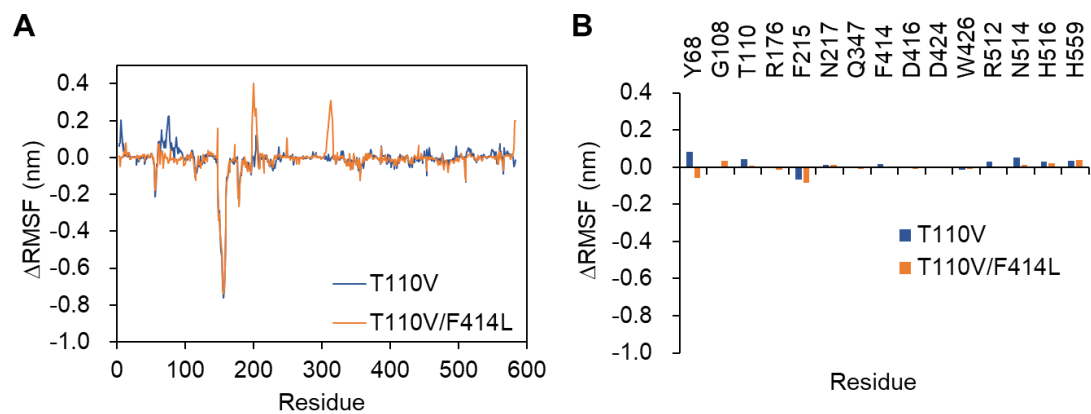

**Fig. S6.** Changes in the RMSF values of all residues (A) and active-site residues (B) of T110V and T110V/F414L relative to the wild-type AnGOx. The data were analyzed using the simulations with D-xylose.

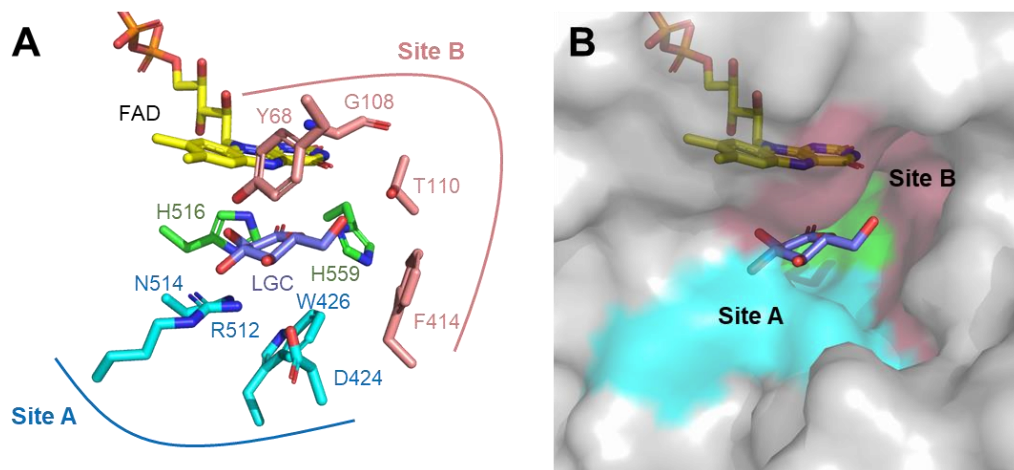

**Fig. S7.** Front view of the substrate pocket of AnGOX. The D-glucose oxidation product LGC was placed in the model by superimposing the structure of AnGOx (PDB: 1CF3) onto that of the AfGDH-LGC complex (PDB: 4YNU). Sites A (cyan) and B (pink) defined in the text are shown. (A) Stick representation. (B) Surface representation.

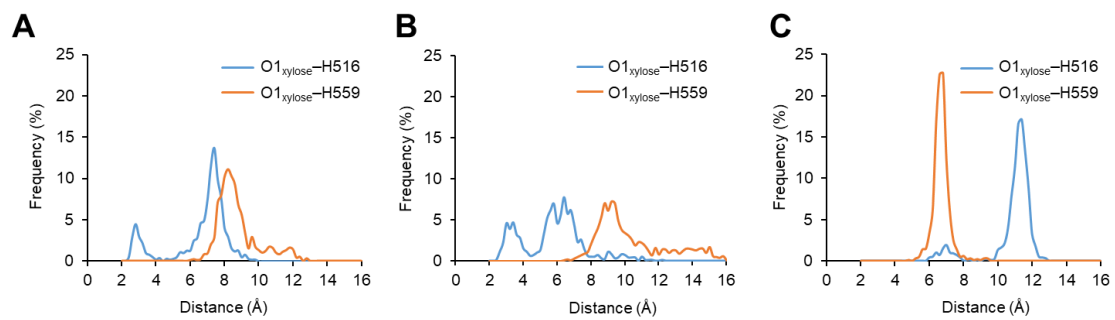

**Fig. S8.** Distribution of distances between the O1 atom of D-glucose and catalytic histidine residues of AnGOx (A), T110V (B), and T110V/F414L (C), during MD simulations.

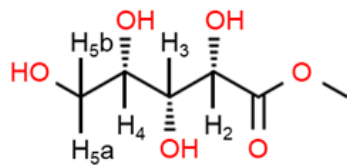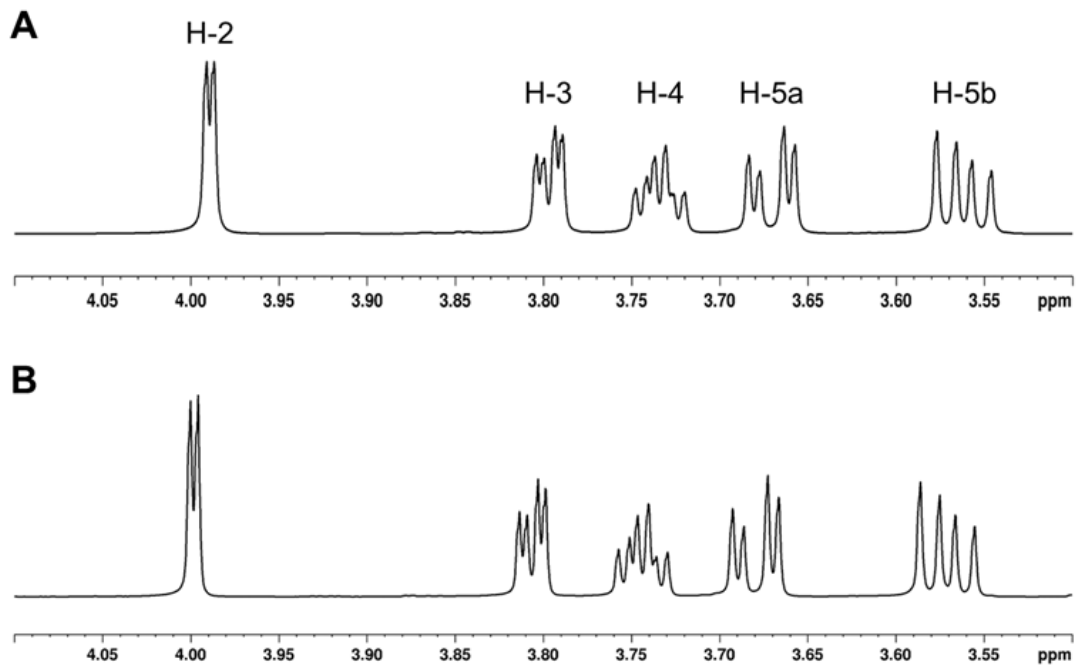

**Fig. S9.** <sup>1</sup>H NMR spectra of commercial lithium D-xylonate as a standard (A) and purified D-xylonate product (B).
